# Supplementary material for: Structurally oriented black phosphorus/MXene heterostructured fibers for flexible supercapacitors with enhanced ion transport and capacitive charge storage
Source: Royal Society of Chemistry journal article supplement (doi:10.1039/d4ta03914a), 2024-01-01
Supplement: d4ta03914a1.pdf [file d4ta03914a1.pdf]

Supporting Information for

**Structurally oriented black phosphorus/MXene heterostructured fibers for flexible supercapacitors with enhanced ion transport and capacitive charge storage**

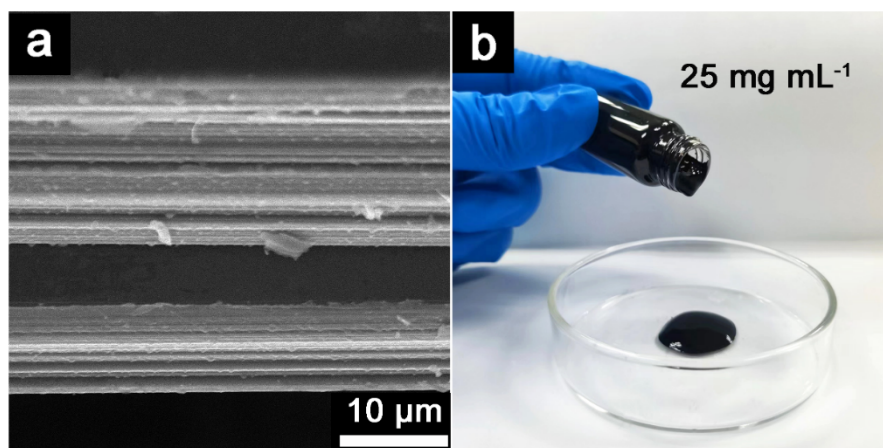

**Fig. S1.** (a) SEM image of unexfoliated BP bulk crystals. (b) Digital images of Ti<sub>3</sub>C<sub>2</sub>T<sub>x</sub> liquid crystals.

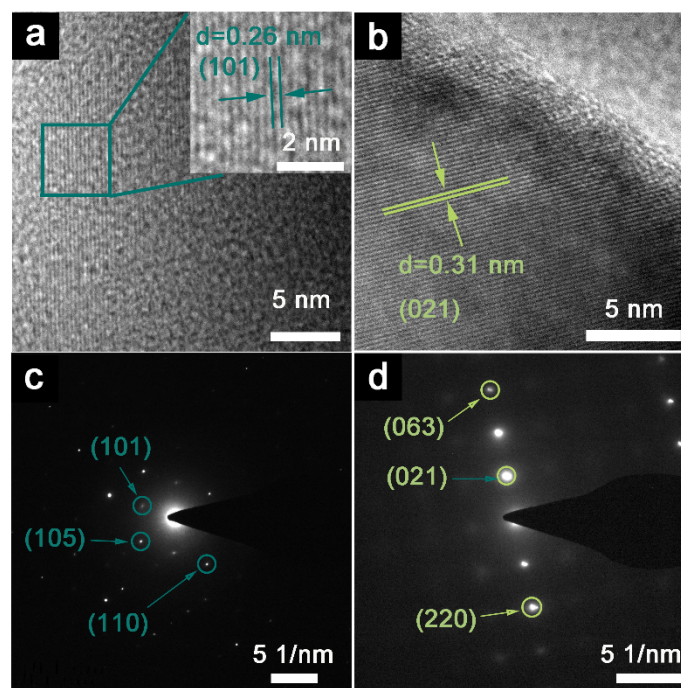

**Fig. S2.** HRTEM images of (a) Ti<sub>3</sub>C<sub>2</sub>T<sub>x</sub> nanosheets and (b) BP nanosheets. SAED patterns of (c) Ti<sub>3</sub>C<sub>2</sub>T<sub>x</sub> nanosheets and (d) BP nanosheets.

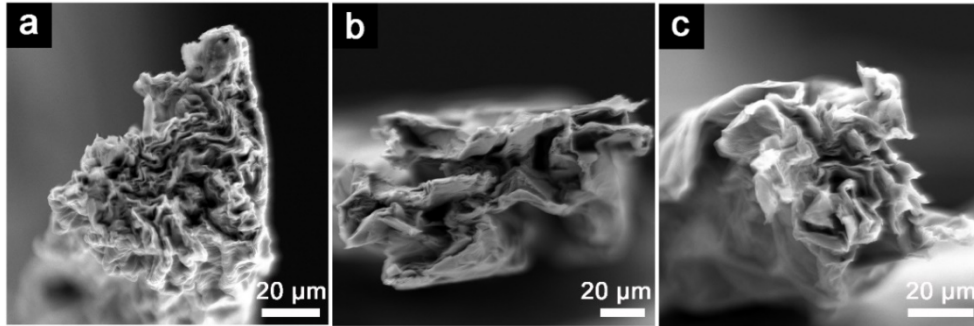

**Fig. S3.** Cross-section SEM images of (a) pure Ti<sub>3</sub>C<sub>2</sub>T<sub>x</sub> fiber, (b) 10% BP/Ti<sub>3</sub>C<sub>2</sub>T<sub>x</sub> and (c) 15% BP/Ti<sub>3</sub>C<sub>2</sub>T<sub>x</sub>.

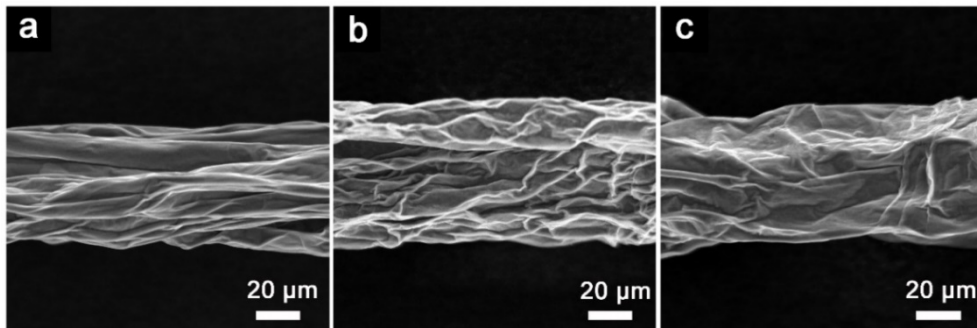

**Fig. S4.** Top-view SEM images of (a) pure Ti<sub>3</sub>C<sub>2</sub>T<sub>x</sub> fiber, (b) 10% BP/Ti<sub>3</sub>C<sub>2</sub>T<sub>x</sub> and (c) 15% BP/Ti<sub>3</sub>C<sub>2</sub>T<sub>x</sub>.

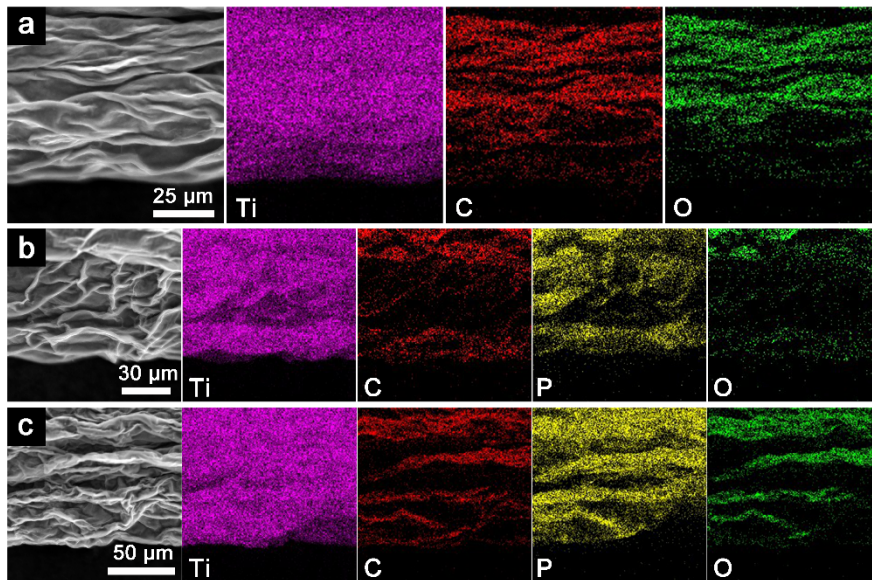

**Fig. S5.** Top-view EDS mapping images of (a) pure Ti<sub>3</sub>C<sub>2</sub>T<sub>x</sub> fiber, (b) 10% BP/Ti<sub>3</sub>C<sub>2</sub>T<sub>x</sub> and (c) 15% BP/Ti<sub>3</sub>C<sub>2</sub>T<sub>x</sub>.

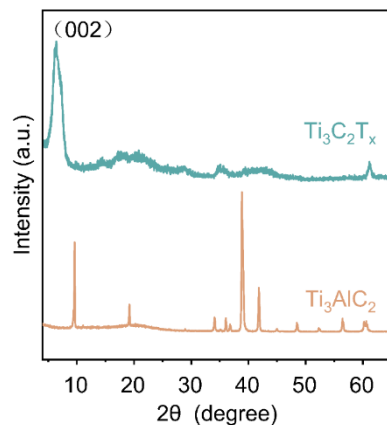

**Fig. S6.** XRD spectra of  $\text{Ti}_3\text{AlC}_2$  and pure  $\text{Ti}_3\text{C}_2\text{T}_x$  fiber.

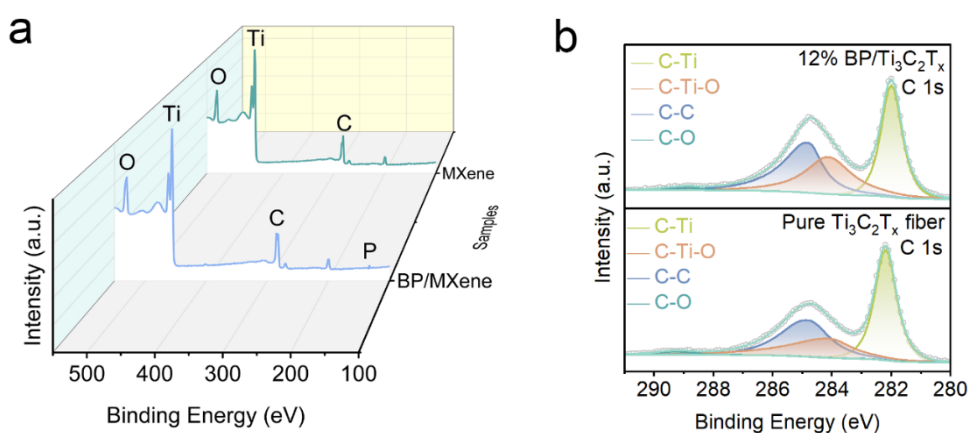

**Fig. S7.** (a) XPS survey spectra, and the high-resolution (b) C 1s spectra of the pure  $\text{Ti}_3\text{C}_2\text{T}_x$  fiber and 12% BP/ $\text{Ti}_3\text{C}_2\text{T}_x$ , respectively.

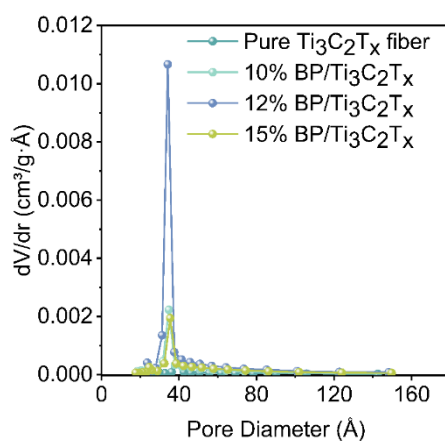

**Fig. S8.** Pore size distributions of the fibers.

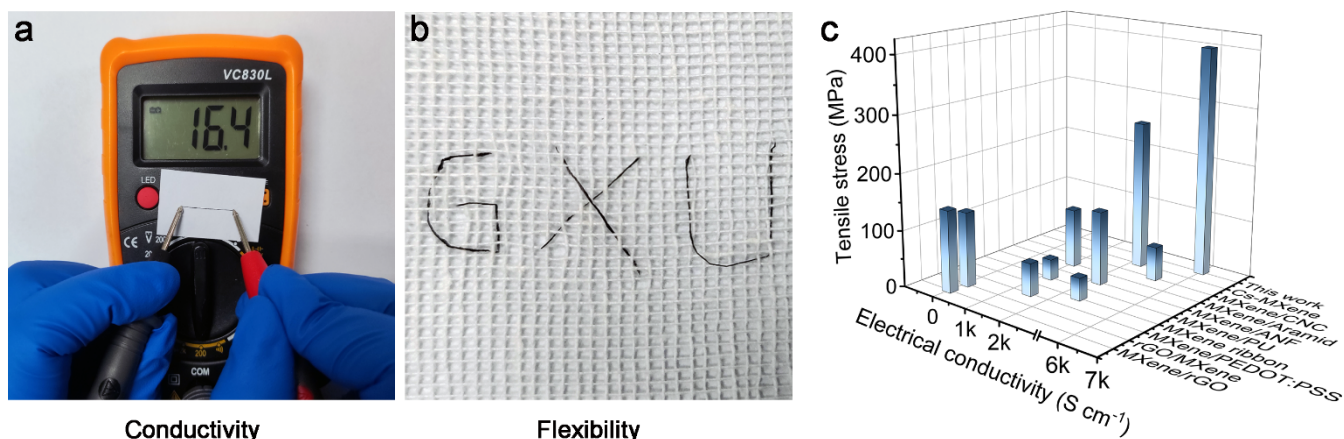

**Fig. S9.** (a) Fiber presenting a resistance of 16.4 Ω. (b) Fiber weaving into “GXU” shape. (c) Comparison of electrical conductivity and mechanical strength: BP/MXene heterostructured fibers were compared with previous MXene-based hybrid fibers.

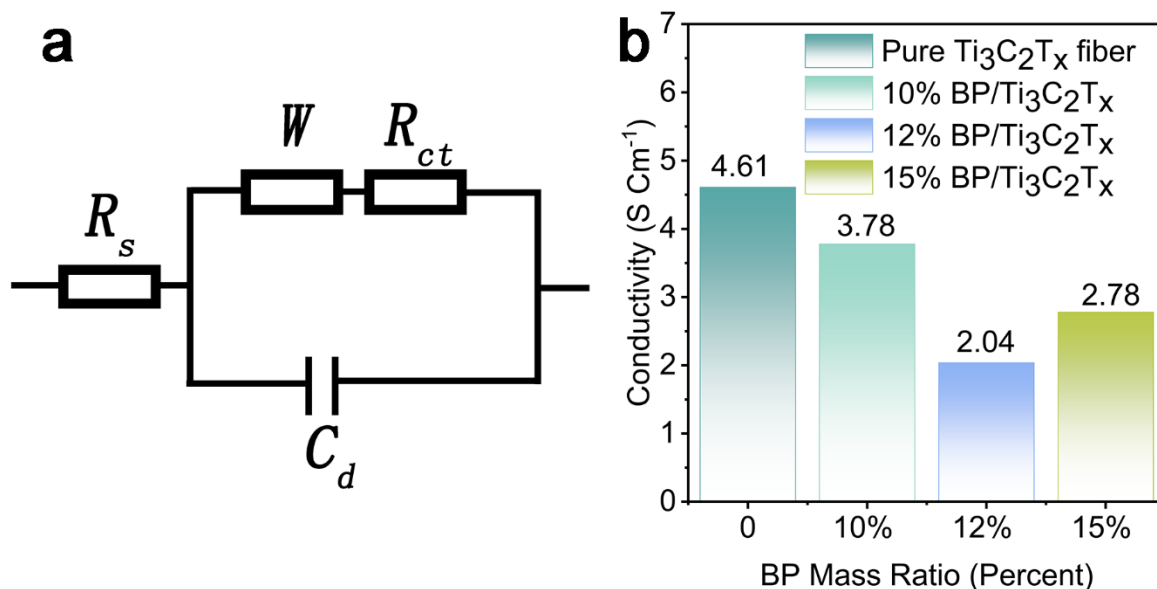

**Fig. S10.** (a) The equivalent circuit diagram used to fit the EIS spectrum in Fig. 4f includes  $R_s$  as series resistance,  $W$  as Warburg impedance,  $R_{ct}$  as charge transfer resistance, and  $C_d$  as intercalation capacitance. (b) ESR of the EIS spectra in Fig. 4f.

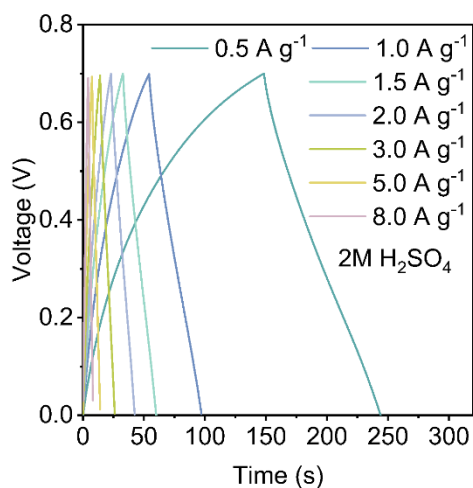

**Fig. S11.** GCD curves of 12% BP/Ti<sub>3</sub>C<sub>2</sub>T<sub>x</sub> based all-solid-state MFSCs in 2 M H<sub>2</sub>SO<sub>4</sub> electrolyte at different current densities.

**Table. S1.** Comparison of tensile strength and electrical conductivity of MXene-based fibers with previously reported work.

| <b>Fiber</b>          | <b>Fabrication method</b> | <b>Tensile strength (MPa)</b> | <b>Conductivity (S cm<sup>-1</sup>)</b> | <b>Ref.</b>       |
|-----------------------|---------------------------|-------------------------------|-----------------------------------------|-------------------|
| MXene/rGO fiber       | Wet-spinning              | 145                           | 28                                      | Ref. <sup>1</sup> |
| rGO/MXene fiber       | Wet-spinning              | 132.5                         | 72.3                                    | Ref. <sup>2</sup> |
| MXene/PEDOT:PSS fiber | Wet-spinning              | 58.1                          | 1489.8                                  | Ref. <sup>3</sup> |
| MXene ribbon fiber    | Wet-spinning              | 40                            | 2458                                    | Ref. <sup>4</sup> |
| MXene/PU fiber        | Wet-spinning              | 37                            | 1195                                    | Ref. <sup>5</sup> |
| MXene/ANF fiber       | Wet-spinning              | 130                           | 2215                                    | Ref. <sup>6</sup> |
| MXene/Aramid fiber    | Wet-spinning              | 104                           | 1025                                    | Ref. <sup>7</sup> |
| MXene/CNC fiber       | Wet-spinning              | 60                            | 3000                                    | Ref. <sup>8</sup> |
| Cs-MXene fiber        | Wet-spinning              | 261.2                         | 2215                                    | Ref. <sup>9</sup> |
| BP/MXene fiber        | Wet-spinning              | 401                           | 6019                                    | This work         |

**Table. S2.** Comparison of energy density and power density of SCs based on BP/Ti<sub>3</sub>C<sub>2</sub>T<sub>x</sub> heterostructured fibers with previously reported MXene based devices.

| <b>Materia</b>                                                                | <b>Voltage (V)</b> | <b>Mass loading</b>         | <b>Energy density (mWh g<sup>-1</sup>)</b> | <b>Power density (mW g<sup>-1</sup>)</b> | <b>Ref.</b>        |
|-------------------------------------------------------------------------------|--------------------|-----------------------------|--------------------------------------------|------------------------------------------|--------------------|
| BP/Ti <sub>3</sub> C <sub>2</sub> T <sub>x</sub> fiber                        | 0.7                | 0.033 mg cm <sup>-1</sup>   | 5.1                                        | 175                                      | This work          |
|                                                                               |                    |                             | 2.7                                        | 7000                                     |                    |
| d-Ti <sub>3</sub> C <sub>2</sub> T <sub>x</sub> film                          | 0.5                | 0.53 mg cm <sup>-2</sup>    | 0.5                                        | 124.2                                    | Ref. <sup>10</sup> |
| Ti <sub>3</sub> C <sub>2</sub> T <sub>x</sub> /CNTs                           | 0.6                | 0.8-1.3 mg cm <sup>-2</sup> | 2.8                                        | 311.0                                    | Ref. <sup>11</sup> |
| Carbon-filled Ti <sub>3</sub> C <sub>2</sub> T <sub>x</sub>                   | 0.6                | 2.0 mg cm <sup>-2</sup>     | 4.8                                        | 124                                      | Ref. <sup>12</sup> |
| MXene on paper                                                                | 0.6                | /                           | 0.1                                        | 46.6                                     | Ref. <sup>13</sup> |
| PPy-MXene                                                                     | 0.6                | /                           | 1.3                                        | 41.1                                     | Ref. <sup>14</sup> |
| 3D-print MXene                                                                | 0.6                | 8.5 mg cm <sup>-2</sup>     | 2.8                                        | 75.3                                     | Ref. <sup>15</sup> |
| Ti <sub>2</sub> CT <sub>x</sub> wire                                          | 0.7                | 0.33 mg cm <sup>-1</sup>    | 0.3                                        | 8.8                                      | Ref. <sup>16</sup> |
| Ti <sub>3</sub> C <sub>2</sub> T <sub>x</sub> /V <sub>2</sub> CT <sub>x</sub> | 0.7                | /                           | 4.9                                        | 350                                      | Ref. <sup>17</sup> |
|                                                                               |                    |                             | 1.4                                        | 3500                                     | Ref. <sup>17</sup> |

## References

1. Q. Yang, Z. Xu, B. Fang, T. Huang, S. Cai, H. Chen, Y. Liu, K. Gopalsamy, W. Gao and C. Gao, *J. Mater. Chem. A*, 2017, **5**, 22113-22119.
2. S. Seyedin, E. R. S. Yanza and Joselito M. Razal, *J. Mater. Chem. A*, 2017, **5**, 24076-24082.
3. J. Zhang, S. Seyedin, S. Qin, Z. Wang, S. Moradi, F. Yang, P. A. Lynch, W. Yang, J. Liu, X. Wang and J. M. Razal, *Small*, 2019, **15**, e1804732.
4. C. Zhu and F. Geng, *Carbon Energy*, 2020, **3**, 142-152.
5. S. Seyedin, S. Uzun, A. Levitt, B. Anasori, G. Dion, Y. Gogotsi and J. M. Razal, *Adv. Funct. Mater.*, 2020, **30**, 1910504
6. L. Wang, M. Zhang, B. Yang and J. Tan, *ACS Appl. Mater. Interfaces*, 2021, **13**, 41933-41945.
7. Q. Liu, A. Zhao, X. He, Q. Li, J. Sun, Z. Lei and Z. H. Liu, *Adv. Funct. Mater.*, 2021, **31**, 2010944

8. K. A. S. Usman, J. Zhang, S. Qin, Y. Yao, P. A. Lynch, P. Mota-Santiago, M. Naebe, L. C. Henderson, D. Hegh and J. M. Razal, *J. Mater. Chem. A*, 2022, **10**, 4770-4781.
9. Y. Zheng, Y. Wang, J. Zhao and Y. Li, *ACS Nano*, 2023, **17**, 2487-2496.
10. S. Xu, G. Wei, J. Li, Y. Ji, N. Klyui, V. Izotov and W. Han, *Chem. Eng. J.*, 2017, **317**, 1026-1036.
11. L. Yang, W. Zheng, P. Zhang, J. Chen, W. B. Tian, Y. M. Zhang and Z. M. Sun, *J. Electroanal. Chem.*, 2018, **830-831**, 1-6.
12. X. Zhu, X. Huang, R. Zhao, K. Liao and V. Chan, *Sustain. Energ. Fuels*, 2020, **4**, 3566-3573.
13. N. Kurra, B. Ahmed, Y. Gogotsi and H. N. Alshareef, *Adv. Energy Mater.*, 2016, **6**, 1601372.
14. J. Yan, Y. Ma, C. Zhang, X. Li, W. Liu, X. Yao, S. Yao and S. Luo, *RSC Adv.*, 2018, **8**, 39742-39748.
15. W. Yang, J. Yang, J. J. Byun, F. P. Moissinac, J. Xu, S. J. Haigh, M. Domingos, M. A. Bissett, R. A. W. Dryfe and S. Barg, *Adv. Mater.*, 2019, **31**, 1902725.
16. K. Krishnamoorthy, P. Pazhamalai, S. Sahoo and S.-J. Kim, *J. Mater. Chem. A*, 2017, **5**, 5726-5736.
17. S. Xu, H. Yang, Y. Li, H. Huang, X. Liang, Y. Wang, Q. Hu, G. Wei and Y. Yang, *Chem. Eng. J.*, 2023, **464**, 142645.
